# Supplementary material for: New Probe for Porcelain Glazes by Luminescence at Near-Infrared Excitation
Source: PubMed Central journal article supplement — ACS Omega. 2021 Mar 12;6(11):7829–33. doi: 10.1021/acsomega.1c00322 (PMC7992157; doi:10.1021/acsomega.1c00322), 2021-03-12
Supplement: ao1c00322_si_001.pdf [file ao1c00322_si_001.pdf]

## Supporting Information

### **New Probe for Porcelain Glazes by Luminescence at Near-Infrared Excitation**

Shoutaro Kamura,<sup>†</sup> Takumi Tani,<sup>†</sup> Hideyuki Matsuo,<sup>‡</sup> Yoshimitsu Onaka,<sup>†</sup> Tomotsumi Fujisawa,<sup>†</sup>  
and Masashi Unno<sup>\*,†,§</sup>

<sup>†</sup>Department of Chemistry and Applied Chemistry, Faculty of Science and Engineering, Saga University,  
Saga 840-8502, Japan

<sup>‡</sup>Saga Ceramics Research Laboratory, 3037-7 Hei Kuromuta, Arita-cho, Nishimatsuura-gun, Saga  
844-0022, Japan

<sup>§</sup>Ceramic Research Center of Saga University, 2441-1 Oono-otsu, Arita-cho, Nishimatsuura-gun, Saga  
844-0013, Japan

### **Corresponding Author**

\* Email: unno@cc.saga-u.ac.jp

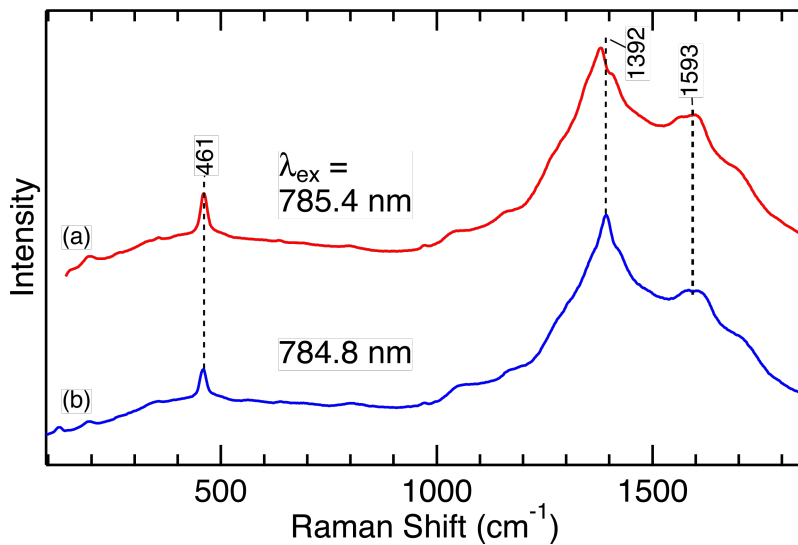

Figure S1. Raman/luminescence spectra of a glazed porcelain sample with 785.4 and 784.8 nm excitation. The spectra were measured at a surface of the sample. The horizontal axis was shown as Raman shift ( $\text{cm}^{-1}$ ).
